# Supplementary material for: Detection of Tuberculosis Recurrence, Diagnosis and Treatment Response by a Blood Transcriptomic Risk Signature in HIV-Infected Persons on Antiretroviral Therapy
Source: Front Microbiol. 2019 Jun 26;10:1441. doi: 10.3389/fmicb.2019.01441 (PMC6608601; doi:10.3389/fmicb.2019.01441)
Supplement: TABLE S1 — 11-gene COR signature scores in CTBC participants. [file Data_Sheet_2.xlsx]

## Sheet: S1_CTBC
Supplementary Table 1: 11-gene COR signature scores in CTBC participants
	Disease.Status		11-gene Score (%)
PID	TB.Status	HIV.Status	Whole blood	PBMC
CTBC001	LTBI	Negative	48.8986784141	2.2026431718
CTBC002	LTBI	Negative	12.7753303965	3.5242290749
CTBC003	LTBI	Negative	46.2555066079	3.5242290749
CTBC005	LTBI	Negative	23.1884057971	1.6216216216
CTBC008	LTBI	Negative	3.7209302326	NA
CTBC010	LTBI	Negative	18.0952380952	1.7621145374
CTBC012	LTBI	Negative	NA	9.7674418605
CTBC015	LTBI	Negative	75.3303964758	4.8458149780
CTBC018	LTBI	Negative	22.4669603524	5.7268722467
CTBC020	LTBI	Negative	NA	2.2026431718
CTBC021	LTBI	Negative	11.0132158590	1.3215859031
CTBC025	LTBI	Negative	49.7737556561	3.1674208145
CTBC026	LTBI	Negative	1.8604651163	17.8403755869
CTBC027	LTBI	Negative	10.9004739336	0.9049773756
CTBC028	LTBI	Negative	3.5897435897	0.9049773756
CTBC031	LTBI	Negative	25.9740259740	2.1645021645
CTBC032	LTBI	Negative	3.0303030303	1.2987012987
CTBC037	LTBI	Negative	28.8659793814	0.8658008658
CTBC038	LTBI	Negative	21.2121212121	1.7316017316
CTBC040	LTBI	Negative	8.6580086580	2.1645021645
CTBC041	LTBI	Negative	6.9264069264	2.1645021645
CTBC042	LTBI	Negative	0.9950248756	0.4329004329
CTBC044	LTBI	Negative	46.3203463203	5.7522123894
CTBC049	LTBI	Negative	2.1645021645	0.4329004329
CTBC052	LTBI	Negative	2.1645021645	1.2987012987
CTBC055	LTBI	Negative	24.1573033708	1.6853932584
CTBC056	LTBI	Negative	57.7181208054	2.8089887640
CTBC058	LTBI	Negative	21.3483146067	1.6853932584
CTBC059	LTBI	Negative	2.8089887640	1.1235955056
CTBC060	LTBI	Negative	22.4719101124	2.8089887640
CTBC004	TB	Negative	99.1189427313	91.1330049261
CTBC006	TB	Negative	96.9162995595	22.9074889868
CTBC007	TB	Negative	89.4273127753	25.2293577982
CTBC009	TB	Negative	96.9162995595	NA
CTBC011	TB	Negative	2.7522935780	10.5726872247
CTBC013	TB	Negative	87.2246696035	3.0837004405
CTBC014	TB	Negative	98.2378854626	37.0044052863
CTBC016	TB	Negative	98.6784140969	81.4977973568
CTBC017	TB	Negative	97.3568281938	55.0660792952
CTBC019	TB	Negative	97.3568281938	22.4669603524
CTBC022	TB	Negative	99.5594713656	44.0528634361
CTBC023	TB	Negative	90.9502262443	21.2669683258
CTBC024	TB	Negative	93.2126696833	NA
CTBC029	TB	Negative	98.6425339367	94.1176470588
CTBC030	TB	Negative	NA	90.6862745098
CTBC033	TB	Negative	92.4778761062	88.1188118812
CTBC034	TB	Negative	NA	74.8917748918
CTBC035	TB	Negative	91.3419913420	58.0086580087
CTBC036	TB	Negative	92.4444444444	41.9913419913
CTBC039	TB	Negative	90.4761904762	33.3333333333
CTBC043	TB	Negative	91.7748917749	89.1774891775
CTBC045	TB	Negative	90.4761904762	9.0909090909
CTBC046	TB	Negative	95.6709956710	NA
CTBC047	TB	Negative	90.0432900433	30.7359307359
CTBC048	TB	Negative	91.3419913420	50.4545454545
CTBC050	TB	Negative	93.0735930736	NA
CTBC051	TB	Negative	86.1471861472	36.7965367965
CTBC053	TB	Negative	87.6404494382	5.3571428571
CTBC054	TB	Negative	94.9438202247	47.7528089888
CTBC057	TB	Negative	91.5730337079	50.5617977528
CTBC102	LTBI	Positive	82.7906976744	63.7209302326
CTBC104	LTBI	Positive	18.4466019417	9.0476190476
CTBC106	LTBI	Positive	57.2093023256	7.9069767442
CTBC110	LTBI	Positive	86.0465116279	45.5813953488
CTBC112	LTBI	Positive	44.1860465116	12.0930232558
CTBC113	LTBI	Positive	85.5813953488	18.1395348837
CTBC115	LTBI	Positive	18.6046511628	8.3720930233
CTBC116	LTBI	Positive	86.9767441860	35.8490566038
CTBC118	LTBI	Positive	85.5813953488	31.1627906977
CTBC120	LTBI	Positive	79.5348837209	21.3953488372
CTBC122	LTBI	Positive	88.8372093023	20.0000000000
CTBC123	LTBI	Positive	55.0660792952	17.6211453744
CTBC129	LTBI	Positive	44.4933920705	18.0616740088
CTBC130	LTBI	Positive	81.0572687225	39.6475770925
CTBC132	LTBI	Positive	32.1585903084	NA
CTBC134	LTBI	Positive	51.9823788546	7.4889867841
CTBC135	LTBI	Positive	85.0220264317	NA
CTBC137	LTBI	Positive	75.3303964758	19.8237885463
CTBC138	LTBI	Positive	86.3436123348	26.4317180617
CTBC139	LTBI	Positive	79.7356828194	18.9427312775
CTBC101	TB	Positive	93.0232558140	73.0232558140
CTBC103	TB	Positive	92.0930232558	88.8372093023
CTBC105	TB	Positive	92.5581395349	77.6744186047
CTBC107	TB	Positive	81.6216216216	69.7674418605
CTBC108	TB	Positive	84.1860465116	20.9302325581
CTBC109	TB	Positive	93.4883720930	81.3953488372
CTBC111	TB	Positive	95.2380952381	86.5116279070
CTBC114	TB	Positive	89.7674418605	55.8139534884
CTBC117	TB	Positive	89.3023255814	80.0000000000
CTBC119	TB	Positive	94.4186046512	66.9767441860
CTBC121	TB	Positive	90.2325581395	30.2325581395
CTBC124	TB	Positive	95.5947136564	NA
CTBC125	TB	Positive	93.3920704846	54.1850220264
CTBC126	TB	Positive	68.2819383260	10.1321585903
CTBC127	TB	Positive	93.8325991189	80.6167400881
CTBC128	TB	Positive	81.4977973568	24.6696035242
CTBC131	TB	Positive	84.5814977974	64.7577092511
CTBC133	TB	Positive	73.5682819383	29.9559471366
CTBC136	TB	Positive	71.8061674009	73.5682819383
CTBC140	TB	Positive	92.5110132159	61.6740088106

## Sheet: S2_TRUTH
Supplementary Table 2: 11-gene COR signature scores in TRUTH participants
PID	Time.to.TB (days)	Study.Group	11-gene Score (%)
TRUTH00034_180	-128	control	11.2554112554
TRUTH00048_180	-117	control	18.6147186147
TRUTH00073_150	-52	control	15.1515151515
TRUTH00048_150	-41	control	24.6753246753
TRUTH00114_180	-31	control	5.6277056277
TRUTH00026_150	-31	control	8.6580086580
TRUTH00111_000	-14	control	15.9817351598
TRUTH00116_120	-7	control	7.7922077922
TRUTH00080_120	0	case	20.7792207792
TRUTH00076_000	0	control	12.1212121212
TRUTH00008_000	0	case	20.3463203463
TRUTH00025_000	0	case	38.9610389610
TRUTH00021_000	0	case	47.2868217054
TRUTH00121_060	1	control	0.8658008658
TRUTH00045_240	1	control	47.2972972973
TRUTH00088_150	9	control	12.5541125541
TRUTH00057_120	12	control	9.5238095238
TRUTH00081_000	12	case	74.0259740260
TRUTH00123_000	20	control	NA
TRUTH00042_300	28	control	20.3463203463
TRUTH00085_000	29	control	11.6883116883
TRUTH00101_120	30	case	71.8614718615
TRUTH00023_150	31	control	12.5541125541
TRUTH00070_360	35	case	77.0562770563
TRUTH00014_000	36	control	20.7792207792
TRUTH00034_120	40	control	NA
TRUTH00028_150	43	control	6.4935064935
TRUTH00040_000	50	control	10.3896103896
TRUTH00002_180	55	control	7.7777777778
TRUTH00039_150	55	case	14.2857142857
TRUTH00087_300	56	case	11.2554112554
TRUTH00128_000	56	control	39.0134529148
TRUTH00127_180	62	case	85.4460093897
TRUTH00059_120	65	control	7.6923076923
TRUTH00098_000	65	control	19.9134199134
TRUTH00018_150	66	case	34.1991341991
TRUTH00078_090	69	case	15.1515151515
TRUTH00063_000	69	control	39.8190045249
TRUTH00074_090	74	case	NA
TRUTH00010_180	75	control	13.4199134199
TRUTH00066_000	79	case	82.6839826840
TRUTH00037_240	80	case	18.6147186147
TRUTH00126_090	81	case	16.4502164502
TRUTH00113_060	83	case	13.8528138528
TRUTH00068_090	84	case	8.5972850679
TRUTH00096_180	84	control	6.4935064935
TRUTH00115_120	84	case	7.7922077922
TRUTH00090_150	84	case	NA
TRUTH00102_060	84	case	20.7792207792
TRUTH00108_120	85	control	32.4675324675
TRUTH00097_180	85	case	12.9870129870
TRUTH00055_150	85	case	26.8398268398
TRUTH00038_180	86	case	10.3896103896
TRUTH00067_150	87	case	13.4529147982
TRUTH00099_180	88	control	10.3896103896
TRUTH00019_120	90	case	15.5844155844
TRUTH00006_090	91	control	12.9870129870
TRUTH00119_180	91	control	17.7489177489
TRUTH00107_120	92	case	27.2727272727
TRUTH00089_120	92	control	73.5930735931
TRUTH00047_360	96	case	15.5844155844
TRUTH00029_090	98	control	11.6883116883
TRUTH00093_150	99	control	25.5411255411
TRUTH00020_060	103	control	20.4188481675
TRUTH00031_060	103	control	13.8528138528
TRUTH00022_300	104	case	34.1991341991
TRUTH00110_060	111	control	13.8528138528
TRUTH00017_180	125	case	25.1082251082
TRUTH00030_240	126	control	8.6580086580
TRUTH00106_150	132	control	15.1515151515
TRUTH00092_150	134	control	8.2251082251
TRUTH00114_120	135	control	12.5541125541
TRUTH00052_360	141	case	11.1111111111
TRUTH00077_060	149	control	26.8398268398
TRUTH00109_180	151	case	12.9870129870
TRUTH00058_120	153	control	34.1991341991
TRUTH00116_060	156	control	25.9740259740
TRUTH00075_180	157	control	17.7489177489
TRUTH00124_120	162	control	56.8888888889
TRUTH00100_000	167	case	19.9134199134
TRUTH00080_060	168	case	24.2424242424
TRUTH00084_090	168	control	NA
TRUTH00056_000	168	case	21.2121212121
TRUTH00112_000	168	case	78.3549783550
TRUTH00053_180	169	case	NA
TRUTH00117_180	169	case	8.2251082251
TRUTH00045_180	169	control	15.1515151515
TRUTH00121_000	171	control	1.2987012987
TRUTH00120_060	172	case	74.8917748918
TRUTH00079_120	173	case	16.8831168831
TRUTH00015_180	175	case	8.2251082251
TRUTH00088_090	177	control	9.5238095238
TRUTH00061_090	177	control	3.5874439462
TRUTH00126_060	179	case	NA
TRUTH00057_060	180	control	2.1645021645
TRUTH00009_180	182	control	17.3160173160
TRUTH00062_300	183	control	9.9567099567
TRUTH00005_000	188	control	16.4502164502
TRUTH00029_060	190	control	32.9004329004
TRUTH00091_120	192	control	9.5238095238
TRUTH00060_000	193	case	34.1991341991
TRUTH00042_240	196	control	4.7619047619
TRUTH00103_120	204	control	16.0173160173
TRUTH00003_120	207	control	7.7922077922
TRUTH00073_060	211	control	13.8528138528
TRUTH00023_090	213	control	8.6580086580
TRUTH00024_000	217	control	31.6017316017
TRUTH00083_060	218	control	12.5541125541
TRUTH00002_120	222	control	13.4199134199
TRUTH00087_240	223	case	16.4502164502
TRUTH00027_180	225	control	30.3030303030
TRUTH00026_060	227	control	22.5108225108
TRUTH00044_000	229	control	9.3333333333
TRUTH00039_090	229	case	11.2554112554
TRUTH00127_120	231	case	31.1688311688
TRUTH00084_060	235	control	NA
TRUTH00122_180	241	control	2.1645021645
TRUTH00010_120	243	control	11.2554112554
TRUTH00013_180	245	control	9.2105263158
TRUTH00055_090	245	case	23.3766233766
TRUTH00108_060	246	control	12.1212121212
TRUTH00113_000	250	case	12.1212121212
TRUTH00102_000	250	case	15.1515151515
TRUTH00118_060	252	control	8.6580086580
TRUTH00115_060	252	case	15.5844155844
TRUTH00019_060	253	case	12.1212121212
TRUTH00090_090	253	case	40.3508771930
TRUTH00067_090	254	case	7.7922077922
TRUTH00038_120	254	case	2.5974025974
TRUTH00099_120	257	control	31.1688311688
TRUTH00047_300	257	case	24.2424242424
TRUTH00119_120	258	control	22.9437229437
TRUTH00093_090	258	control	70.7762557078
TRUTH00107_060	259	case	55.1111111111
TRUTH00095_180	259	control	10.4072398190
TRUTH00096_120	259	control	7.3593073593
TRUTH00037_180	259	case	9.5238095238
TRUTH00097_120	260	case	12.9870129870
TRUTH00046_120	264	control	9.0909090909
TRUTH00089_060	265	control	67.9653679654
TRUTH00020_000	271	control	9.0909090909
TRUTH00031_000	271	control	61.3207547170
TRUTH00022_240	272	case	45.8874458874
TRUTH00110_000	279	control	24.6753246753
TRUTH00094_300	280	control	37.3873873874
TRUTH00125_150	285	control	9.9567099567
TRUTH00064_060	286	control	11.6883116883
TRUTH00101_030	287	case	90.0432900433
TRUTH00028_060	291	control	6.0606060606
TRUTH00016_120	293	control	28.5714285714
TRUTH00041_120	293	control	18.1818181818
TRUTH00071_000	294	control	18.1818181818
TRUTH00030_180	297	control	43.2900432900
TRUTH00017_120	299	case	39.8268398268
TRUTH00011_150	300	control	11.6883116883
TRUTH00104_300	302	control	14.2857142857
TRUTH00052_300	305	case	33.7662337662
TRUTH00012_000	306	control	14.2857142857
TRUTH00069_180	307	control	8.6580086580
TRUTH00078_000	310	case	51.5151515152
TRUTH00074_000	317	case	NA
TRUTH00018_060	318	case	29.4372294372
TRUTH00058_060	319	control	50.6493506494
TRUTH00035_300	322	control	10.8225108225
TRUTH00050_300	324	control	11.2554112554
TRUTH00075_120	324	control	15.1515151515
TRUTH00116_000	325	control	12.1212121212
TRUTH00124_060	330	control	16.8831168831
TRUTH00079_060	335	case	9.0909090909
TRUTH00007_240	335	control	13.8528138528
TRUTH00068_000	336	case	7.7922077922
TRUTH00080_000	336	case	18.1818181818
TRUTH00015_120	336	case	8.6580086580
TRUTH00117_120	337	case	8.5858585859
TRUTH00077_000	338	control	12.3853211009
TRUTH00120_000	340	case	77.9220779221
TRUTH00126_000	342	case	21.8009478673
TRUTH00006_000	344	control	14.2857142857
TRUTH00053_120	344	case	8.6580086580
TRUTH00057_000	349	control	41.9913419913
TRUTH00065_000	349	control	14.2857142857
TRUTH00101_000	366	case	41.9913419913
TRUTH00003_060	370	control	NA
TRUTH00001_240	371	control	18.1818181818
TRUTH00106_060	371	control	32.9004329004
TRUTH00070_240	371	case	62.7705627706
TRUTH00034_000	376	control	8.6580086580
TRUTH00029_000	378	control	9.1324200913
TRUTH00073_000	379	control	13.4199134199
TRUTH00103_060	383	control	13.8528138528
TRUTH00092_060	386	control	9.5238095238
TRUTH00083_000	387	control	10.3896103896
TRUTH00048_000	387	control	20.7792207792
TRUTH00027_120	393	control	16.1137440758
TRUTH00043_180	395	control	13.4199134199
TRUTH00026_000	395	control	21.2121212121
TRUTH00082_180	399	control	22.0779220779
TRUTH00072_300	401	control	20.7792207792
TRUTH00122_120	401	control	10.8225108225
TRUTH00059_000	402	control	8.1447963801
TRUTH00109_090	402	case	9.3333333333
TRUTH00084_000	403	control	7.7922077922
TRUTH00036_180	408	case	19.4805194805
TRUTH00013_120	413	control	19.4805194805
TRUTH00108_000	414	control	7.7922077922
TRUTH00115_000	420	case	12.5541125541
TRUTH00118_000	421	control	31.1688311688
TRUTH00019_000	421	case	11.2554112554
TRUTH00095_120	421	control	14.7186147186
TRUTH00046_060	422	control	12.1212121212
TRUTH00054_000	428	control	7.7922077922
TRUTH00088_000	429	control	NA
TRUTH00009_090	431	control	5.6277056277
TRUTH00061_000	431	control	5.6872037915
TRUTH00089_000	433	control	32.9004329004
TRUTH00004_000	439	control	30.3030303030
TRUTH00094_240	448	control	2.1645021645
TRUTH00023_000	451	control	17.7489177489
TRUTH00064_000	454	control	10.1851851852
TRUTH00105_180	456	control	10.8225108225
TRUTH00028_000	459	control	7.3593073593
TRUTH00016_060	460	control	61.9047619048
TRUTH00041_060	462	control	49.7835497835
TRUTH00086_180	463	control	8.2251082251
TRUTH00039_000	470	case	9.9567099567
TRUTH00114_000	471	control	NA
TRUTH00069_120	475	control	8.5972850679
TRUTH00032_000	480	control	10.8225108225
TRUTH00087_150	480	case	9.5238095238
TRUTH00018_000	486	case	21.6450216450
TRUTH00058_000	489	control	8.5972850679
TRUTH00035_240	495	control	20.7792207792
TRUTH00090_000	504	case	NA
TRUTH00067_000	505	case	10.0877192982
TRUTH00055_000	505	case	13.4199134199
TRUTH00093_000	510	control	27.2727272727
TRUTH00091_000	529	control	NA
TRUTH00125_060	540	control	NA
TRUTH00003_000	543	control	7.7922077922
TRUTH00049_150	551	control	22.0779220779
TRUTH00011_060	552	control	16.0173160173
TRUTH00106_000	552	control	46.8468468468
TRUTH00051_180	554	case	45.0216450216
TRUTH00092_000	554	control	9.0909090909
TRUTH00002_000	559	control	15.1960784314
TRUTH00127_000	567	case	93.2989690722
TRUTH00082_120	567	control	16.8949771689
TRUTH00010_000	579	control	74.4588744589
TRUTH00096_000	588	control	9.5238095238
TRUTH00033_180	589	control	8.2251082251
TRUTH00097_000	589	case	14.7186147186
TRUTH00038_000	590	case	13.4199134199
TRUTH00099_000	592	control	29.0043290043
TRUTH00119_000	595	control	13.8528138528
TRUTH00070_150	623	case	24.6753246753
TRUTH00041_000	628	control	81.3852813853
TRUTH00017_000	629	case	17.7489177489
TRUTH00016_000	631	control	55.4112554113
TRUTH00001_150	640	control	9.0909090909
TRUTH00109_000	657	case	12.9870129870
TRUTH00075_000	659	control	14.7186147186
TRUTH00015_000	672	case	9.0909090909
TRUTH00053_000	673	case	16.0173160173
TRUTH00117_000	673	case	NA
TRUTH00045_000	673	control	86.1471861472
TRUTH00009_000	686	control	7.7922077922
TRUTH00094_150	700	control	4.3290043290
TRUTH00125_000	707	control	6.4935064935
TRUTH00011_000	720	control	20.7792207792
TRUTH00027_000	729	control	16.0173160173
TRUTH00035_150	742	control	38.5281385281
TRUTH00122_000	746	control	NA
TRUTH00095_000	756	control	27.2300469484
TRUTH00037_000	764	case	69.2640692641
TRUTH00013_000	794	control	NA
TRUTH00086_060	799	control	10.3896103896
TRUTH00030_000	801	control	39.3939393939
TRUTH00069_000	811	control	11.2554112554
TRUTH00062_060	854	control	16.4502164502
TRUTH00042_000	868	control	6.0606060606
TRUTH00070_060	876	case	22.5108225108
TRUTH00051_060	890	case	24.2574257426
TRUTH00043_000	899	control	53.7777777778
TRUTH00087_000	900	case	9.5238095238
TRUTH00082_000	903	control	21.0762331839
TRUTH00036_000	912	case	28.5714285714
TRUTH00033_060	925	control	17.3160173160
TRUTH00047_060	925	case	61.0389610390
TRUTH00022_000	944	case	45.4954954955
TRUTH00094_060	952	control	8.2251082251
TRUTH00105_000	960	control	50.6493506494
TRUTH00049_000	971	control	9.0909090909
TRUTH00104_060	981	control	14.7186147186
TRUTH00052_060	981	case	8.0000000000
TRUTH00035_060	994	control	13.8528138528
TRUTH00007_000	1007	control	29.1079812207
TRUTH00050_060	1010	control	16.0173160173
TRUTH00001_000	1054	control	14.2857142857
TRUTH00072_060	1073	control	25.9740259740

## Sheet: S3_IMPRESS
Supplementary Table 3: 11-gene COR signature scores in IMPRESS participants
PID	Study.Time.Point	Time.To.Culture.Conversion	Conversion.Status	11-gene Score (%)
IMPRESS0017_000	Baseline	15	Early	93.7777777778
IMPRESS0017_020	Month 2	15	Early	88.4444444444
IMPRESS0017_080	EOT	15	Early	63.1111111111
IMPRESS0024_000	Baseline	15	Early	72.0000000000
IMPRESS0024_020	Month 2	15	Early	88.4444444444
IMPRESS0024_060	EOT	15	Early	76.0000000000
IMPRESS0035_000	Baseline	22	Early	97.2222222222
IMPRESS0035_020	Month 2	22	Early	91.3636363636
IMPRESS0035_080	EOT	22	Early	97.2222222222
IMPRESS0055_000	Baseline	23	Early	74.6666666667
IMPRESS0055_020	Month 2	23	Early	92.4444444444
IMPRESS0055_080	EOT	23	Early	NA
IMPRESS0012_000	Baseline	25	Early	97.2222222222
IMPRESS0012_020	Month 2	25	Early	90.2222222222
IMPRESS0012_060	EOT	25	Early	78.2178217822
IMPRESS0053_000	Baseline	25	Early	NA
IMPRESS0053_020	Month 2	25	Early	75.9259259259
IMPRESS0053_060	EOT	25	Early	68.7782805430
IMPRESS0054_000	Baseline	26	Early	90.6666666667
IMPRESS0054_020	Month 2	26	Early	88.4444444444
IMPRESS0054_080	EOT	26	Early	56.9444444444
IMPRESS0038_000	Baseline	26	Early	91.8604651163
IMPRESS0038_020	Month 2	26	Early	74.0740740741
IMPRESS0038_080	EOT	26	Early	73.3333333333
IMPRESS0061_000	Baseline	26	Early	93.7777777778
IMPRESS0061_020	Month 2	26	Early	72.8888888889
IMPRESS0004_000	Baseline	26	Early	92.4444444444
IMPRESS0004_020	Month 2	26	Early	72.4444444444
IMPRESS0004_060	EOT	26	Early	82.6666666667
IMPRESS0011_000	Baseline	27	Early	65.3333333333
IMPRESS0011_020	Month 2	27	Early	NA
IMPRESS0011_060	EOT	27	Early	58.6666666667
IMPRESS0010_000	Baseline	28	Early	NA
IMPRESS0010_020	Month 2	28	Early	72.8888888889
IMPRESS0010_060	EOT	28	Early	72.4444444444
IMPRESS0036_000	Baseline	28	Early	98.1481481481
IMPRESS0036_020	Month 2	28	Early	93.7777777778
IMPRESS0036_080	EOT	28	Early	92.8888888889
IMPRESS0020_000	Baseline	28	Early	92.4444444444
IMPRESS0020_020	Month 2	28	Early	88.0000000000
IMPRESS0020_080	EOT	28	Early	56.9767441860
IMPRESS0056_000	Baseline	28	Early	89.3333333333
IMPRESS0056_020	Month 2	28	Early	64.7619047619
IMPRESS0056_060	EOT	28	Early	47.6923076923
IMPRESS0062_000	Baseline	28	Early	96.0000000000
IMPRESS0062_020	Month 2	28	Early	90.6666666667
IMPRESS0062_060	EOT	28	Early	67.5555555556
IMPRESS0034_000	Baseline	28	Early	89.3333333333
IMPRESS0034_020	Month 2	28	Early	NA
IMPRESS0034_060	EOT	28	Early	65.7777777778
IMPRESS0046_000	Baseline	28	Early	93.6651583710
IMPRESS0046_020	Month 2	28	Early	86.2222222222
IMPRESS0046_060	EOT	28	Early	55.5555555556
IMPRESS0018_000	Baseline	28	Early	93.2126696833
IMPRESS0018_020	Month 2	28	Early	88.4444444444
IMPRESS0018_080	EOT	28	Early	73.3333333333
IMPRESS0060_000	Baseline	29	Early	92.4444444444
IMPRESS0060_020	Month 2	29	Early	91.1111111111
IMPRESS0060_080	EOT	29	Early	64.2201834862
IMPRESS0041_000	Baseline	34	Early	93.7777777778
IMPRESS0041_020	Month 2	34	Early	92.8888888889
IMPRESS0041_060	EOT	34	Early	71.7821782178
IMPRESS0009_000	Baseline	39	Early	91.1111111111
IMPRESS0009_020	Month 2	39	Early	92.0000000000
IMPRESS0009_060	EOT	39	Early	48.8888888889
IMPRESS0027_000	Baseline	40	Early	64.8148148148
IMPRESS0027_020	Month 2	40	Early	NA
IMPRESS0027_060	EOT	40	Early	NA
IMPRESS0006_000	Baseline	41	Early	92.4444444444
IMPRESS0006_020	Month 2	41	Early	64.0000000000
IMPRESS0006_080	EOT	41	Early	44.8888888889
IMPRESS0058_000	Baseline	41	Early	88.4444444444
IMPRESS0058_020	Month 2	41	Early	92.4444444444
IMPRESS0058_060	EOT	41	Early	43.1111111111
IMPRESS0015_000	Baseline	42	Early	NA
IMPRESS0015_020	Month 2	42	Early	99.0476190476
IMPRESS0015_060	EOT	42	Early	91.2037037037
IMPRESS0001_000	Baseline	42	Early	91.5555555556
IMPRESS0001_020	Month 2	42	Early	NA
IMPRESS0001_060	EOT	42	Early	64.8888888889
IMPRESS0014_000	Baseline	42	Early	69.7777777778
IMPRESS0014_020	Month 2	42	Early	73.3333333333
IMPRESS0014_080	EOT	42	Early	48.0000000000
IMPRESS0031_000	Baseline	42	Early	NA
IMPRESS0031_020	Month 2	42	Early	90.6666666667
IMPRESS0031_080	EOT	42	Early	78.2222222222
IMPRESS0059_000	Baseline	43	Early	88.8888888889
IMPRESS0059_020	Month 2	43	Early	75.5555555556
IMPRESS0059_060	EOT	43	Early	76.8888888889
IMPRESS0016_000	Baseline	46	Early	NA
IMPRESS0016_020	Month 2	46	Early	92.0000000000
IMPRESS0016_060	EOT	46	Early	96.7592592593
IMPRESS0050_000	Baseline	52	Early	92.0000000000
IMPRESS0050_020	Month 2	52	Early	71.1111111111
IMPRESS0050_080	EOT	52	Early	70.6666666667
IMPRESS0033_000	Baseline	54	Early	97.2222222222
IMPRESS0033_020	Month 2	54	Early	NA
IMPRESS0033_060	EOT	54	Early	68.9814814815
IMPRESS0040_000	Baseline	54	Early	90.6666666667
IMPRESS0040_020	Month 2	54	Early	67.5555555556
IMPRESS0040_080	EOT	54	Early	48.8888888889
IMPRESS0048_000	Baseline	54	Early	62.5000000000
IMPRESS0048_020	Month 2	54	Early	68.8888888889
IMPRESS0048_080	EOT	54	Early	49.7777777778
IMPRESS0019_000	Baseline	55	Early	69.3333333333
IMPRESS0019_020	Month 2	55	Early	57.7777777778
IMPRESS0019_060	EOT	55	Early	NA
IMPRESS0022_000	Baseline	55	Early	66.2222222222
IMPRESS0022_020	Month 2	55	Early	85.3333333333
IMPRESS0022_060	EOT	55	Early	69.1860465116
IMPRESS0003_000	Baseline	55	Early	88.4444444444
IMPRESS0003_020	Month 2	55	Early	90.6666666667
IMPRESS0003_060	EOT	55	Early	50.6666666667
IMPRESS0028_000	Baseline	56	Early	96.7592592593
IMPRESS0028_020	Month 2	56	Early	97.2222222222
IMPRESS0028_080	EOT	56	Early	70.2222222222
IMPRESS0052_000	Baseline	56	Early	95.5555555556
IMPRESS0052_020	Month 2	56	Early	NA
IMPRESS0052_060	EOT	56	Early	69.3467336683
IMPRESS0025_000	Baseline	56	Early	92.7601809955
IMPRESS0025_020	Month 2	56	Early	67.5555555556
IMPRESS0025_080	EOT	56	Early	89.7777777778
IMPRESS0049_000	Baseline	56	Early	93.3333333333
IMPRESS0049_020	Month 2	56	Early	71.1111111111
IMPRESS0049_060	EOT	56	Early	NA
IMPRESS0063_000	Baseline	56	Early	92.8888888889
IMPRESS0063_020	Month 2	56	Early	89.7777777778
IMPRESS0063_080	EOT	56	Early	75.0000000000
IMPRESS0047_000	Baseline	56	Early	NA
IMPRESS0047_020	Month 2	56	Early	71.5555555556
IMPRESS0047_080	EOT	56	Early	72.4444444444
IMPRESS0039_000	Baseline	58	Late	70.3703703704
IMPRESS0039_080	EOT	58	Late	98.1481481481
IMPRESS0043_000	Baseline	78	Late	NA
IMPRESS0043_060	EOT	78	Late	73.1481481481
IMPRESS0037_000	Baseline	79	Late	92.4444444444
IMPRESS0037_020	Month 2	79	Late	76.1627906977
IMPRESS0037_060	EOT	79	Late	69.9074074074
IMPRESS0008_000	Baseline	82	Late	86.8750000000
IMPRESS0008_020	Month 2	82	Late	93.3333333333
IMPRESS0008_080	EOT	82	Late	84.0000000000
IMPRESS0023_000	Baseline	82	Late	75.1111111111
IMPRESS0023_020	Month 2	82	Late	92.8888888889
IMPRESS0023_060	EOT	82	Late	72.0000000000
IMPRESS0029_000	Baseline	83	Late	94.6666666667
IMPRESS0029_020	Month 2	83	Late	94.2222222222
IMPRESS0029_080	EOT	83	Late	84.8888888889
IMPRESS0007_000	Baseline	83	Late	88.4444444444
IMPRESS0007_020	Month 2	83	Late	87.8378378378
IMPRESS0007_060	EOT	83	Late	49.7777777778
IMPRESS0045_000	Baseline	83	Late	NA
IMPRESS0045_020	Month 2	83	Late	93.6651583710
IMPRESS0045_080	EOT	83	Late	73.3333333333
IMPRESS0005_000	Baseline	84	Late	NA
IMPRESS0005_020	Month 2	84	Late	96.5346534653
IMPRESS0005_060	EOT	84	Late	95.3703703704
IMPRESS0026_000	Baseline	84	Late	79.6296296296
IMPRESS0026_020	Month 2	84	Late	81.4814814815
IMPRESS0026_080	EOT	84	Late	69.9074074074
IMPRESS0021_000	Baseline	84	Late	88.8888888889
IMPRESS0021_020	Month 2	84	Late	88.8888888889
IMPRESS0021_060	EOT	84	Late	52.4444444444
IMPRESS0042_000	Baseline	84	Late	91.1111111111
IMPRESS0042_080	EOT	84	Late	NA
IMPRESS0051_000	Baseline	84	Late	90.2222222222
IMPRESS0051_020	Month 2	84	Late	NA
IMPRESS0051_080	EOT	84	Late	94.2222222222
IMPRESS0057_000	Baseline	85	Late	91.5555555556
IMPRESS0057_020	Month 2	85	Late	92.8888888889
IMPRESS0057_080	EOT	85	Late	92.4444444444
IMPRESS0030_000	Baseline	89	Late	71.1111111111
IMPRESS0030_020	Month 2	89	Late	90.9523809524
IMPRESS0030_060	EOT	89	Late	58.6666666667
IMPRESS0002_000	Baseline	91	Late	93.3333333333
IMPRESS0002_020	Month 2	91	Late	NA
IMPRESS0002_060	EOT	91	Late	49.7777777778
IMPRESS0013_000	Baseline	108	Late	92.8888888889
IMPRESS0013_020	Month 2	108	Late	76.7772511848
IMPRESS0013_080	EOT	108	Late	72.8888888889
IMPRESS0044_000	Baseline	112	Late	93.7777777778
IMPRESS0044_020	Month 2	112	Late	92.8888888889
IMPRESS0044_060	EOT	112	Late	92.8888888889
IMPRESS0032_000	Baseline	113	Late	97.2222222222
IMPRESS0032_060	EOT	113	Late	NA

## Sheet: S4_Paste_raw_CT_data_here
Supplementary Table 4: Worksheet for entry of raw Ct values from the qRT-PCR assay
Gene type	TaqMan Primer-Probe	Gene	Paste Ct values for single sample below
Reference	ACTR3.Hs01029159_g1	ACTR3	12.7701
Reference	ADRBK1.Hs01056345_g1	ADRBK1	12.4055
Reference	CDC42.Hs03044122_g1	CDC42	11.7325
Reference	CSDE1.Hs00918650_m1	CSDE1	13.3307
Reference	CYTIP.Hs00188734_m1	CYTIP	16.376
Reference	TMBIM6.Hs01012081_m1	TMBIM6	17.951
Reference	TMBIM6.Hs00162661_m1	TMBIM6	11.353
Reference	TMBIM6.Hs01012082_g1	TMBIM6	15.5638
Reference	TPM3.Hs01900726_g1	TPM3	14.3582
Reference	USF2.Hs01100994_g1	USF2	13.1086
Signature	GBP1.Hs00977005_m1	GBP1	15.2832
Signature	GBP2.Hs00894837_m1	GBP2	15.0185
Signature	GBP2.Hs00894846_g1	GBP2	14.4866
Signature	SERPING1.Hs00934330_m1	SERPING1	20.5232
Signature	STAT1.Hs01013995_g1	STAT1	15.3146
Signature	SCARF1.Hs01092483_m1	SCARF1	22.1665
Signature	SERPING1.Hs00934329_m1	SERPING1	20.1812
Signature	GBP1.Hs00266717_m1	GBP1	14.7795
Signature	GBP2.Hs00894842_g1	GBP2	15.8207
Signature	STAT1.Hs01014002_m1	STAT1	14.9567
Signature	SERPING1.Hs00935959_m1	SERPING1	22.4298
Signature	STAT1.Hs01013998_m1	STAT1	16.7962
Signature	TRAFD1.Hs00938765_m1	TRAFD1	17.179
Signature	SCARF1.Hs01092485_g1	SCARF1	22.4529
Signature	ETV7.Hs00903230_g1	ETV7	21.1617
Signature	TAP1.Hs00897093_g1	TAP1	14.7084
Signature	STAT1.Hs01013993_m1	STAT1	18.3076
Signature	SERPING1.Hs00934328_g1	SERPING1	20.783
Signature	SERPING1.Hs00163781_m1	SERPING1	20.3882
Signature	BATF2.Hs00912736_m1	BATF2	22.2473
Signature	STAT1.Hs01013997_m1	STAT1	23.583
Signature	STAT1.Hs01013996_m1	STAT1	14.3966
Signature	STAT1.Hs01013994_m1	STAT1	17.6651
Signature	STAT1.Hs01013992_g1	STAT1	23.0288
Signature	STAT1.Hs01013991_m1	STAT1	19.837
Signature	STAT1.Hs01013989_m1	STAT1	14.8556
Signature	FCGR1C.Hs00417598_m1	FCGR1C	15.837
Signature	STAT1.Hs01014000_m1	STAT1	17.8832
Signature	SCARF1.Hs01092482_g1	SCARF1	21.02
Signature	GBP2.Hs00894840_mH	GBP2	14.8753
Signature	ETV7.Hs00903228_m1	ETV7	21.0791
Signature	SCARF1.Hs00186503_m1	SCARF1	22.3453
Signature	GBP5.Hs00369472_m1	GBP5	14.5035
Signature	TAP1.Hs00388675_m1	TAP1	16.5923
Signature	ETV7-j2	ETV7	24.453
Signature	GBP1-j1	GBP1	14.6125
Signature	GBP2-j1	GBP2	14.3362
Signature	GBP5-j4	GBP5	15.5316

## Sheet: S5_Risk_score_Calculation
Supplementary Table 5: Worksheet that calculates risk scores upon input of raw Ct values
				Final result:
			Ct values from Sheet 4	Automatically computed 11-gene risk signature score (also in row U)	Step 1: a sample-specific normalization factor is computed based on the reference primer-probes	Step 2: The raw Ct values for each primer-probe is subtracted from the normalization factor		Step 3: The normalized data for each primer-probe is fed into the transcript pair-wise network structure. Each row in this section represents a single SVM pair model. Each SVM pair model takes as input the normalized expression data from two qPCR primer-probes. The SVM score for the pair ("SVM pair score") is computed from the normalized data using the two weights (Weight1 and Weight2) and the Co…											Step 4: A "vote" (case or control) is computed for each pair based on the "SVM pair score". If the score is > 0, the vote = 1 ("case"). If the score is < 0, the vote = 0. ("control")	Step 5: The final TB risk score is the average of all the votes in the network.
Gene type	TaqMan Primer-Probe	Gene	Ct values	Risk score	Normalization Factor	Normalized Data		Primer-Probe1	Primer Probe1 Normalized Data	Primer-Probe2	Primer-Probe2 Normalized Data		Weight1 parameter	Weight2 parameter	Constant parameter		Computed pair score		Computed pair vote	Final computed TB risk score
Reference	ACTR3.Hs01029159_g1	ACTR3	12.7701	0.121212	13.8949	1.12483		FCGR1C.Hs00417598_m1	-1.94205	GBP2.Hs00894846_g1	-0.591707		0.989019	0.350334	-0.0323861		-2.1604		0	0.121212
Reference	ADRBK1.Hs01056345_g1	ADRBK1	12.4055			1.48945		GBP2-j1	-0.441227	GBP1-j1	-0.717587		0.352167	1.21441	2.06111		1.03428		1
Reference	CDC42.Hs03044122_g1	CDC42	11.7325			2.16248		GBP2-j1	-0.441227	STAT1.Hs01013997_m1	-9.68808		1.79145	0.690126	3.0344		-4.44203		0
Reference	CSDE1.Hs00918650_m1	CSDE1	13.3307			0.564203		GBP2-j1	-0.441227	SCARF1.Hs01092485_g1	-8.55795		2.20175	-0.00171362	-1.44567		-2.40248		0
Reference	CYTIP.Hs00188734_m1	CYTIP	16.376			-2.48102		GBP2-j1	-0.441227	STAT1.Hs01013994_m1	-3.77019		2.19993	-0.00196353	-1.3526		-2.31587		0
Reference	TMBIM6.Hs01012081_m1	TMBIM6	17.951			-4.05611		GBP2-j1	-0.441227	SERPING1.Hs00935959_m1	-8.53482		2.18284	-0.00229246	-1.26553		-2.20909		0
Reference	TMBIM6.Hs00162661_m1	TMBIM6	11.353			2.54197		GBP2-j1	-0.441227	GBP1.Hs00977005_m1	-1.38824		0.484019	1.29118	0.255812		-1.75021		0
Reference	TMBIM6.Hs01012082_g1	TMBIM6	15.5638			-1.6689		GBP2-j1	-0.441227	TAP1.Hs00897093_g1	-0.813417		1.09428	1.37719	0.471203		-1.13185		0
Reference	TPM3.Hs01900726_g1	TPM3	14.3582			-0.463247		GBP2-j1	-0.441227	STAT1.Hs01013993_m1	-4.4127		0.719193	1.65117	-0.646336		-8.24978		0
Reference	USF2.Hs01100994_g1	USF2	13.1086			0.786323		GBP2-j1	-0.441227	SERPING1.Hs00163781_m1	-6.49331		2.20741	-0.00169947	-1.44393		-2.40686		0
Signature	GBP1.Hs00977005_m1	GBP1	15.2832			-1.38824		GBP2-j1	-0.441227	STAT1.Hs01013996_m1	-0.501687		0.847443	1.4461	-1.39743		-2.49683		0
Signature	GBP2.Hs00894837_m1	GBP2	15.0185			-1.12356		GBP2-j1	-0.441227	STAT1.Hs01014002_m1	-1.06176		0.217394	1.97095	1.38693		-0.80166		0
Signature	GBP2.Hs00894846_g1	GBP2	14.4866			-0.591707		GBP2-j1	-0.441227	SERPING1.Hs00934329_m1	-6.28625		2.2842	-0.00172007	-1.54942		-2.54646		0
Signature	SERPING1.Hs00934330_m1	SERPING1	20.5232			-6.62821		GBP2-j1	-0.441227	SCARF1.Hs01092483_m1	-8.27157		1.37914	0.695724	2.49551		-3.86773		0
Signature	STAT1.Hs01013995_g1	STAT1	15.3146			-1.41963		GBP2-j1	-0.441227	SERPING1.Hs00934328_g1	-6.88806		2.20692	-0.00170734	-1.44096		-2.40295		0
Signature	SCARF1.Hs01092483_m1	SCARF1	22.1665			-8.27157		GBP2-j1	-0.441227	STAT1.Hs01013995_g1	-1.41963		1.00587	1.07398	-0.174949		-2.14342		0
Signature	SERPING1.Hs00934329_m1	SERPING1	20.1812			-6.28625		GBP1-j1	-0.717587	FCGR1C.Hs00417598_m1	-1.94205		0.715885	0.636782	1.43835		-0.31202		0
Signature	GBP1.Hs00266717_m1	GBP1	14.7795			-0.884587		GBP1-j1	-0.717587	ETV7.Hs00903230_g1	-7.26676		1.32099	2.18788e-05	2.11702		1.16894		1
Signature	GBP2.Hs00894842_g1	GBP2	15.8207			-1.92578		GBP1-j1	-0.717587	BATF2.Hs00912736_m1	-8.35234		1.33162	-0.000456183	2.17523		1.22349		1
Signature	STAT1.Hs01014002_m1	STAT1	14.9567			-1.06176		GBP1-j1	-0.717587	GBP2.Hs00894837_m1	-1.12356		1.29776	0.214128	2.24112		1.06928		1
Signature	SERPING1.Hs00935959_m1	SERPING1	22.4298			-8.53482		GBP1-j1	-0.717587	STAT1.Hs01013994_m1	-3.77019		1.33121	-0.000534804	2.20072		1.24748		1
Signature	STAT1.Hs01013998_m1	STAT1	16.7962			-2.90128		GBP1-j1	-0.717587	GBP1.Hs00977005_m1	-1.38824		0.686572	0.754215	1.55289		0.0131857		1
Signature	TRAFD1.Hs00938765_m1	TRAFD1	17.179			-3.28401		GBP1-j1	-0.717587	SERPING1.Hs00935959_m1	-8.53482		1.39539	-0.000251084	2.25318		1.25401		1
Signature	SCARF1.Hs01092485_g1	SCARF1	22.4529			-8.55795		GBP1-j1	-0.717587	GBP1.Hs00977005_m1	-1.38824		0.711402	0.760907	1.59532		0.0285079		1
Signature	ETV7.Hs00903230_g1	ETV7	21.1617			-7.26676		GBP1-j1	-0.717587	TAP1.Hs00897093_g1	-0.813417		1.14461	0.588754	2.64182		1.34156		1
Signature	TAP1.Hs00897093_g1	TAP1	14.7084			-0.813417		GBP1-j1	-0.717587	STAT1.Hs01013993_m1	-4.4127		0.922716	1.07963	1.61741		-3.8088		0
Signature	STAT1.Hs01013993_m1	STAT1	18.3076			-4.4127		GBP1-j1	-0.717587	STAT1.Hs01013992_g1	-9.13383		1.02959	1.20584	10.0525		-1.70025		0
Signature	SERPING1.Hs00934328_g1	SERPING1	20.783			-6.88806		GBP1-j1	-0.717587	STAT1.Hs01013996_m1	-0.501687		1.12646	0.382193	1.77235		0.772276		1
Signature	SERPING1.Hs00163781_m1	SERPING1	20.3882			-6.49331		GBP1-j1	-0.717587	GBP1.Hs00977005_m1	-1.38824		0.690584	0.73865	1.5584		0.0374246		1
Signature	BATF2.Hs00912736_m1	BATF2	22.2473			-8.35234		GBP1-j1	-0.717587	STAT1.Hs01014002_m1	-1.06176		0.576865	1.24859	2.02611		0.28646		1
Signature	STAT1.Hs01013997_m1	STAT1	23.583			-9.68808		GBP1-j1	-0.717587	TRAFD1.Hs00938765_m1	-3.28401		1.32971	-0.000488537	2.24776		1.29518		1
Signature	STAT1.Hs01013996_m1	STAT1	14.3966			-0.501687		GBP1-j1	-0.717587	GBP1.Hs00977005_m1	-1.38824		0.68678	0.754125	1.55323		0.0135014		1
Signature	STAT1.Hs01013994_m1	STAT1	17.6651			-3.77019		GBP1-j1	-0.717587	FCGR1C.Hs00417598_m1	-1.94205		0.744211	0.589613	1.43788		-0.241212		0
Signature	STAT1.Hs01013992_g1	STAT1	23.0288			-9.13383		GBP1-j1	-0.717587	GBP2.Hs00894846_g1	-0.591707		1.58338	-0.43363	2.97581		2.09618		1
Signature	STAT1.Hs01013991_m1	STAT1	19.837			-5.94201		GBP1-j1	-0.717587	GBP1.Hs00977005_m1	-1.38824		0.681074	0.749028	1.54319		0.0146318		1
Signature	STAT1.Hs01013989_m1	STAT1	14.8556			-0.960667		GBP1-j1	-0.717587	GBP1.Hs00266717_m1	-0.884587		0.415366	0.90114	1.38866		0.293462		1
Signature	FCGR1C.Hs00417598_m1	FCGR1C	15.837			-1.94205		GBP1-j1	-0.717587	SCARF1.Hs01092483_m1	-8.27157		0.974472	0.761654	5.34458		-1.65476		0
Signature	STAT1.Hs01014000_m1	STAT1	17.8832			-3.98826		GBP1-j1	-0.717587	SERPING1.Hs00934328_g1	-6.88806		1.3859	-0.000562151	2.40357		1.41294		1
Signature	SCARF1.Hs01092482_g1	SCARF1	21.02			-7.12501		GBP1-j1	-0.717587	GBP1.Hs00266717_m1	-0.884587		0.415366	0.90114	1.38866		0.293462		1
Signature	GBP2.Hs00894840_mH	GBP2	14.8753			-0.980367		GBP1-j1	-0.717587	GBP2.Hs00894842_g1	-1.92578		1.19352	0.554055	2.76356		0.840119		1
Signature	ETV7.Hs00903228_m1	ETV7	21.0791			-7.1842		GBP1-j1	-0.717587	GBP1.Hs00266717_m1	-0.884587		0.415366	0.90114	1.38866		0.293462		1
Signature	SCARF1.Hs00186503_m1	SCARF1	22.3453			-8.45035		GBP1-j1	-0.717587	GBP1.Hs00977005_m1	-1.38824		0.690835	0.738909	1.55884		0.037325		1
Signature	GBP5.Hs00369472_m1	GBP5	14.5035			-0.608547		GBP1-j1	-0.717587	STAT1.Hs01013998_m1	-2.90128		1.13978	0.456745	3.04637		0.903335		1
Signature	TAP1.Hs00388675_m1	TAP1	16.5923			-2.69738		GBP1-j1	-0.717587	SERPING1.Hs00934330_m1	-6.62821		-0.197036	1.0629	3.5301		-3.37363		0
Signature	ETV7-j2	ETV7	24.453			-10.5581		GBP1-j1	-0.717587	ETV7.Hs00903228_m1	-7.1842		1.40817	-0.000317355	2.22646		1.21826		1
Signature	GBP1-j1	GBP1	14.6125			-0.717587		GBP1-j1	-0.717587	GBP2.Hs00894846_g1	-0.591707		1.58324	-0.433587	2.97904		2.09948		1
Signature	GBP2-j1	GBP2	14.3362			-0.441227		GBP1-j1	-0.717587	GBP2.Hs00894837_m1	-1.12356		1.31278	0.174194	2.26817		1.13042		1
Signature	GBP5-j4	GBP5	15.5316			-1.63667		SERPING1.Hs00934328_g1	-6.88806	GBP2.Hs00894846_g1	-0.591707		-0.00778095	2.45862	-0.587509		-1.9887		0
								FCGR1C.Hs00417598_m1	-1.94205	GBP2.Hs00894837_m1	-1.12356		0.895267	0.394906	-0.179788		-2.36214		0
								ETV7.Hs00903230_g1	-7.26676	GBP1.Hs00977005_m1	-1.38824		-0.00217665	1.49226	0.632317		-1.42348		0
								ETV7.Hs00903230_g1	-7.26676	TAP1.Hs00897093_g1	-0.813417		-0.000231451	1.96472	1.09749		-0.498965		0
								ETV7.Hs00903230_g1	-7.26676	GBP2.Hs00894846_g1	-0.591707		-0.00114142	1.89327	-0.40038		-1.51235		0
								ETV7.Hs00903230_g1	-7.26676	GBP1.Hs00977005_m1	-1.38824		-0.00217677	1.49226	0.632346		-1.42345		0
								ETV7.Hs00903230_g1	-7.26676	GBP2.Hs00894842_g1	-1.92578		-0.000467256	2.04153	1.74583		-2.18231		0
								ETV7.Hs00903230_g1	-7.26676	STAT1.Hs01013998_m1	-2.90128		-0.000949693	2.1619	4.26364		-2.00173		0
								ETV7.Hs00903230_g1	-7.26676	SERPING1.Hs00934330_m1	-6.62821		-0.00654176	0.943987	3.42896		-2.78044		0
								ETV7.Hs00903230_g1	-7.26676	GBP2.Hs00894846_g1	-0.591707		-0.00104398	1.89303	-0.432454		-1.54499		0
								ETV7.Hs00903230_g1	-7.26676	GBP2.Hs00894837_m1	-1.12356		-0.00190538	2.53692	-1.50499		-4.34152		0
								BATF2.Hs00912736_m1	-8.35234	GBP2.Hs00894837_m1	-1.12356		-0.00622887	2.63255	-1.47972		-4.38551		0
								BATF2.Hs00912736_m1	-8.35234	SERPING1.Hs00935959_m1	-8.53482		-0.810593	0.811001	-0.0452642		-0.196663		0
								BATF2.Hs00912736_m1	-8.35234	GBP1.Hs00977005_m1	-1.38824		-0.000915613	1.4944	0.898569		-1.16836		0
								BATF2.Hs00912736_m1	-8.35234	GBP2.Hs00894846_g1	-0.591707		-0.00718067	2.28481	-0.6038		-1.89576		0
								BATF2.Hs00912736_m1	-8.35234	GBP1.Hs00977005_m1	-1.38824		-0.00041969	1.4942	0.651744		-1.41905		0
								BATF2.Hs00912736_m1	-8.35234	STAT1.Hs01013998_m1	-2.90128		-0.000142593	2.27113	4.39396		-2.19403		0
								BATF2.Hs00912736_m1	-8.35234	SERPING1.Hs00934330_m1	-6.62821		-0.000560179	0.96875	3.65037		-2.76603		0
								STAT1.Hs01013997_m1	-9.68808	GBP2.Hs00894846_g1	-0.591707		0.790499	1.53954	4.30898		-4.26039		0
								STAT1.Hs01013997_m1	-9.68808	SERPING1.Hs00934329_m1	-6.28625		1.21586	-0.00197807	6.64929		-5.11762		0
								STAT1.Hs01013997_m1	-9.68808	SCARF1.Hs01092483_m1	-8.27157		0.669806	1.25293	9.55564		-7.29719		0
								STAT1.Hs01013997_m1	-9.68808	GBP2.Hs00894846_g1	-0.591707		0.780882	1.5423	4.26332		-4.21451		0
								STAT1.Hs01013997_m1	-9.68808	GBP2.Hs00894837_m1	-1.12356		0.643309	1.582	2.84186		-5.16803		0
								GBP2.Hs00894837_m1	-1.12356	GBP5.Hs00369472_m1	-0.608547		0.0793298	1.30149	0.807408		-0.0737414		0
								GBP2.Hs00894837_m1	-1.12356	GBP1.Hs00977005_m1	-1.38824		0.00513332	1.46086	0.607393		-1.42639		0
								GBP2.Hs00894837_m1	-1.12356	SERPING1.Hs00163781_m1	-6.49331		2.75766	-0.00550397	-1.82782		-4.89047		0
								GBP2.Hs00894837_m1	-1.12356	GBP1.Hs00977005_m1	-1.38824		-0.0278154	1.49063	0.634159		-1.40394		0
								GBP2.Hs00894837_m1	-1.12356	GBP1.Hs00977005_m1	-1.38824		-0.0158235	1.47003	0.618179		-1.40479		0
								GBP2.Hs00894837_m1	-1.12356	SERPING1.Hs00934329_m1	-6.28625		2.76608	-0.00562398	-1.88154		-4.95403		0
								GBP2.Hs00894837_m1	-1.12356	GBP1.Hs00266717_m1	-0.884587		0.61853	1.04089	0.344154		-1.27156		0
								GBP2.Hs00894837_m1	-1.12356	SERPING1.Hs00934328_g1	-6.88806		2.7701	-0.00567224	-1.86725		-4.94054		0
								GBP2.Hs00894837_m1	-1.12356	STAT1.Hs01013991_m1	-5.94201		0.781252	1.64689	6.13806		-4.52555		0
								GBP2.Hs00894837_m1	-1.12356	STAT1.Hs01013998_m1	-2.90128		0.681465	1.63497	2.94866		-2.56051		0
								GBP2.Hs00894837_m1	-1.12356	SERPING1.Hs00934330_m1	-6.62821		0.0326647	0.913492	3.34614		-2.74537		0
								SCARF1.Hs01092485_g1	-8.55795	SERPING1.Hs00935959_m1	-8.53482		-0.934673	0.935864	-0.559836		-0.548382		0
								SCARF1.Hs01092485_g1	-8.55795	GBP1.Hs00977005_m1	-1.38824		-0.000744747	1.49295	0.477514		-1.58868		0
								SCARF1.Hs01092485_g1	-8.55795	STAT1.Hs01014002_m1	-1.06176		-0.00494499	2.29056	1.60865		-0.781049		0
								SCARF1.Hs01092485_g1	-8.55795	GBP1.Hs00977005_m1	-1.38824		-0.000744739	1.49296	0.477516		-1.58869		0
								SCARF1.Hs01092485_g1	-8.55795	GBP2.Hs00894846_g1	-0.591707		-0.00759457	2.4408	-0.638052		-2.0173		0
								SCARF1.Hs01092485_g1	-8.55795	GBP2.Hs00894840_mH	-0.980367		0.00823635	1.86305	0.572789		-1.32417		0
								SCARF1.Hs01092485_g1	-8.55795	STAT1.Hs01013991_m1	-5.94201		-0.00257158	2.04071	7.80503		-4.29888		0
								SCARF1.Hs01092485_g1	-8.55795	STAT1.Hs01013998_m1	-2.90128		-0.000256615	2.2355	4.28765		-2.19596		0
								SCARF1.Hs01092485_g1	-8.55795	SERPING1.Hs00934330_m1	-6.62821		0.000652022	0.950186	3.26926		-3.03435		0
								SCARF1.Hs01092485_g1	-8.55795	GBP2.Hs00894846_g1	-0.591707		-0.00753147	2.44064	-0.658691		-2.03838		0
								SCARF1.Hs01092485_g1	-8.55795	GBP2.Hs00894837_m1	-1.12356		-0.00558232	2.74026	-1.76676		-4.79783		0
								STAT1.Hs01013994_m1	-3.77019	GBP2.Hs00894846_g1	-0.591707		-0.00784335	2.4421	-0.548444		-1.96388		0
								STAT1.Hs01013994_m1	-3.77019	SERPING1.Hs00934329_m1	-6.28625		-0.995639	0.995671	-0.0553233		-2.56061		0
								STAT1.Hs01013994_m1	-3.77019	GBP2.Hs00894842_g1	-1.92578		0.0048842	2.19952	1.80511		-2.44909		0
								ETV7-j2	-10.5581	STAT1.Hs01013992_g1	-9.13383		0.000285403	2.00562	12.8451		-5.4769		0
								ETV7-j2	-10.5581	GBP2.Hs00894846_g1	-0.591707		0.00141785	1.9618	-0.448292		-1.62407		0
								ETV7-j2	-10.5581	STAT1.Hs01013995_g1	-1.41963		0.00118075	1.92092	0.51725		-2.22221		0
								ETV7-j2	-10.5581	STAT1.Hs01013991_m1	-5.94201		0.00121742	1.88237	7.08852		-4.10939		0
								ETV7-j2	-10.5581	STAT1.Hs01014000_m1	-3.98826		-0.000379002	0.85608	2.03916		-1.37111		0
								ETV7-j2	-10.5581	STAT1.Hs01013989_m1	-0.960667		0.00211765	2.23454	0.497817		-1.67119		0
								ETV7-j2	-10.5581	STAT1.Hs01013998_m1	-2.90128		0.000366889	2.23313	4.44386		-2.03894		0
								ETV7-j2	-10.5581	SERPING1.Hs00934330_m1	-6.62821		0.00174821	0.92526	3.16375		-2.98752		0
								ETV7-j2	-10.5581	GBP2.Hs00894846_g1	-0.591707		0.0014391	1.96168	-0.452391		-1.62832		0
								ETV7-j2	-10.5581	GBP2.Hs00894837_m1	-1.12356		0.00144646	2.34469	-1.55343		-4.20309		0
								GBP5.Hs00369472_m1	-0.608547	TRAFD1.Hs00938765_m1	-3.28401		1.48794	-0.00499303	0.765206		-0.123878		0
								GBP1.Hs00977005_m1	-1.38824	TRAFD1.Hs00938765_m1	-3.28401		1.48185	-0.0013725	0.629235		-1.42342		0
								GBP1.Hs00977005_m1	-1.38824	GBP2.Hs00894846_g1	-0.591707		1.46138	0.0066525	0.601643		-1.43104		0
								GBP1.Hs00977005_m1	-1.38824	SERPING1.Hs00934330_m1	-6.62821		0.217382	0.80812	3.08004		-2.57812		0
								GBP1.Hs00977005_m1	-1.38824	GBP2.Hs00894846_g1	-0.591707		1.45455	0.0119276	0.596125		-1.43019		0
								SERPING1.Hs00935959_m1	-8.53482	GBP1.Hs00977005_m1	-1.38824		-0.000633011	1.48733	0.446955		-1.61241		0
								SERPING1.Hs00935959_m1	-8.53482	TAP1.Hs00897093_g1	-0.813417		0.00648861	2.00369	1.12843		-0.556785		0
								SERPING1.Hs00935959_m1	-8.53482	STAT1.Hs01013993_m1	-4.4127		0.00768731	2.13094	-0.13722		-9.60602		0
								SERPING1.Hs00935959_m1	-8.53482	GBP1.Hs00977005_m1	-1.38824		-0.00078869	1.48887	0.486005		-1.57417		0
								SERPING1.Hs00935959_m1	-8.53482	STAT1.Hs01014002_m1	-1.06176		-0.00466933	2.34209	1.42726		-1.01962		0
								SERPING1.Hs00935959_m1	-8.53482	GBP1.Hs00977005_m1	-1.38824		-0.00078313	1.48925	0.484843		-1.57591		0
								SERPING1.Hs00935959_m1	-8.53482	GBP2.Hs00894846_g1	-0.591707		-0.00895717	2.47597	-0.251743		-1.64034		0
								SERPING1.Hs00935959_m1	-8.53482	GBP1.Hs00977005_m1	-1.38824		-0.000777427	1.48803	0.482792		-1.57631		0
								SERPING1.Hs00935959_m1	-8.53482	GBP2.Hs00894840_mH	-0.980367		0.00830331	1.8595	0.542081		-1.35178		0
								SERPING1.Hs00935959_m1	-8.53482	GBP2.Hs00894842_g1	-1.92578		0.00435017	2.10208	1.87818		-2.20709		0
								SERPING1.Hs00935959_m1	-8.53482	GBP1.Hs00266717_m1	-0.884587		0.00300687	1.38892	0.675534		-0.57875		0
								SERPING1.Hs00935959_m1	-8.53482	GBP1.Hs00977005_m1	-1.38824		-0.00063284	1.48751	0.447008		-1.61261		0
								SERPING1.Hs00935959_m1	-8.53482	STAT1.Hs01014000_m1	-3.98826		0.000984581	0.963274	2.12935		-1.72084		0
								SERPING1.Hs00935959_m1	-8.53482	STAT1.Hs01013998_m1	-2.90128		-0.000174791	2.16104	4.19628		-2.072		0
								SERPING1.Hs00935959_m1	-8.53482	GBP2.Hs00894846_g1	-0.591707		-0.00817042	2.46277	-0.432935		-1.82044		0
								SERPING1.Hs00935959_m1	-8.53482	GBP2.Hs00894837_m1	-1.12356		-0.00550264	2.76077	-1.83478		-4.8897		0
								GBP1.Hs00977005_m1	-1.38824	TAP1.Hs00897093_g1	-0.813417		1.27536	0.377286	0.8361		-1.24129		0
								GBP1.Hs00977005_m1	-1.38824	STAT1.Hs01013996_m1	-0.501687		1.25943	0.451084	0.24101		-1.73368		0
								GBP1.Hs00977005_m1	-1.38824	TRAFD1.Hs00938765_m1	-3.28401		1.48026	-0.00137393	0.628665		-1.42177		0
								GBP1.Hs00977005_m1	-1.38824	GBP2.Hs00894846_g1	-0.591707		1.46075	0.00705408	0.601277		-1.43076		0
								GBP1.Hs00977005_m1	-1.38824	SERPING1.Hs00934328_g1	-6.88806		1.49352	-0.00039948	0.310136		-1.76047		0
								GBP1.Hs00977005_m1	-1.38824	GBP2.Hs00894842_g1	-1.92578		1.08296	0.548087	1.00402		-1.55488		0
								GBP1.Hs00977005_m1	-1.38824	SCARF1.Hs01092482_g1	-7.12501		1.49276	-0.000622713	0.447764		-1.6201		0
								GBP1.Hs00977005_m1	-1.38824	STAT1.Hs01013998_m1	-2.90128		1.35875	0.230763	1.02931		-1.52646		0
								GBP1.Hs00977005_m1	-1.38824	SERPING1.Hs00934330_m1	-6.62821		0.213767	0.809027	3.07878		-2.58038		0
								GBP1.Hs00977005_m1	-1.38824	GBP2.Hs00894846_g1	-0.591707		1.49742	0.00660472	0.621739		-1.46094		0
								GBP1.Hs00977005_m1	-1.38824	GBP2.Hs00894837_m1	-1.12356		1.49093	-0.0194448	0.632467		-1.41545		0
								TAP1.Hs00897093_g1	-0.813417	GBP2.Hs00894842_g1	-1.92578		1.6969	0.984753	2.30757		-0.969132		0
								TAP1.Hs00897093_g1	-0.813417	SCARF1.Hs01092482_g1	-7.12501		2.01883	0.00601699	1.29774		-0.387282		0
								TAP1.Hs00897093_g1	-0.813417	GBP2.Hs00894846_g1	-0.591707		1.49451	1.17671	1.01564		-0.896287		0
								TAP1.Hs00897093_g1	-0.813417	GBP2.Hs00894837_m1	-1.12356		1.17228	1.40407	0.024899		-2.50621		0
								STAT1.Hs01013993_m1	-4.4127	GBP2.Hs00894846_g1	-0.591707		1.67822	0.745805	-0.355729		-8.2025		0
								STAT1.Hs01013993_m1	-4.4127	SERPING1.Hs00934329_m1	-6.28625		2.11023	0.00904043	-0.61956		-9.9882		0
								STAT1.Hs01013993_m1	-4.4127	SCARF1.Hs01092483_m1	-8.27157		1.60095	0.712835	3.0216		-9.93917		0
								STAT1.Hs01013993_m1	-4.4127	GBP2.Hs00894842_g1	-1.92578		2.12416	0.0562479	-0.275739		-9.75733		0
								STAT1.Hs01013993_m1	-4.4127	GBP2.Hs00894846_g1	-0.591707		1.68359	0.748191	-0.355531		-8.22741		0
								STAT1.Hs01013993_m1	-4.4127	GBP2.Hs00894837_m1	-1.12356		1.58676	1.20059	-0.752196		-9.10302		0
								SERPING1.Hs00163781_m1	-6.49331	GBP2.Hs00894846_g1	-0.591707		-0.00799328	2.45956	-0.54572		-1.94916		0
								SERPING1.Hs00163781_m1	-6.49331	SERPING1.Hs00934329_m1	-6.28625		-1.05423	1.0546	-0.0277807		0.188182		1
								SERPING1.Hs00163781_m1	-6.49331	GBP2.Hs00894846_g1	-0.591707		-0.00867745	2.45956	-0.319761		-1.71875		0
								SERPING1.Hs00163781_m1	-6.49331	GBP2.Hs00894837_m1	-1.12356		-0.00551672	2.75772	-1.82474		-4.88737		0
								SCARF1.Hs00186503_m1	-8.45035	GBP2.Hs00894846_g1	-0.591707		-0.00763942	2.43558	-0.62241		-1.999		0
								SCARF1.Hs00186503_m1	-8.45035	GBP2.Hs00894842_g1	-1.92578		0.00483875	2.1899	1.80751		-2.45064		0
								STAT1.Hs01013992_g1	-9.13383	TRAFD1.Hs00938765_m1	-3.28401		2.13629	-0.00402816	13.8002		-5.69907		0
								STAT1.Hs01013992_g1	-9.13383	SERPING1.Hs00934330_m1	-6.62821		0.677802	0.817211	7.54728		-4.06029		0
								SERPING1.Hs00163781_m1	-6.49331	GBP2.Hs00894846_g1	-0.591707		-0.00863132	2.45949	-0.334915		-1.73417		0
								SERPING1.Hs00163781_m1	-6.49331	GBP2.Hs00894846_g1	-0.591707		-0.0081476	2.45955	-0.494743		-1.89717		0
								SERPING1.Hs00163781_m1	-6.49331	GBP2.Hs00894837_m1	-1.12356		-0.00551577	2.75772	-1.82497		-4.88761		0
								STAT1.Hs01013996_m1	-0.501687	GBP2.Hs00894846_g1	-0.591707		1.27751	1.00366	-1.07206		-2.30684		0
								STAT1.Hs01013996_m1	-0.501687	GBP2.Hs00894846_g1	-0.591707		1.30027	1.03125	-1.08777		-2.3503		0
								STAT1.Hs01013996_m1	-0.501687	GBP2.Hs00894837_m1	-1.12356		1.19853	1.26855	-1.54265		-3.56923		0
								GBP1.Hs00977005_m1	-1.38824	GBP2.Hs00894846_g1	-0.591707		1.4678	0.00520348	0.606082		-1.43465		0
								GBP1.Hs00977005_m1	-1.38824	SERPING1.Hs00934329_m1	-6.28625		1.49377	-0.000452579	0.326644		-1.74422		0
								STAT1.Hs01014002_m1	-1.06176	SERPING1.Hs00934329_m1	-6.28625		2.33494	-0.00466771	1.43162		-1.01818		0
								STAT1.Hs01014002_m1	-1.06176	SCARF1.Hs01092483_m1	-8.27157		1.67591	0.58036	3.94163		-2.63827		0
								STAT1.Hs01014002_m1	-1.06176	SERPING1.Hs00934330_m1	-6.62821		1.22081	0.586378	3.24649		-1.93635		0
								STAT1.Hs01014002_m1	-1.06176	ETV7.Hs00903228_m1	-7.1842		2.39641	-0.00498453	1.66378		-0.844815		0
								STAT1.Hs01014002_m1	-1.06176	GBP2.Hs00894846_g1	-0.591707		1.98637	0.154864	1.48806		-0.712616		0
								TRAFD1.Hs00938765_m1	-3.28401	GBP1.Hs00977005_m1	-1.38824		-0.00134843	1.47187	0.61818		-1.4207		0
								TRAFD1.Hs00938765_m1	-3.28401	SERPING1.Hs00934329_m1	-6.28625		-1.12124	1.11893	2.68837		-0.66334		0
								TRAFD1.Hs00938765_m1	-3.28401	GBP1.Hs00266717_m1	-0.884587		0.00273817	1.37928	0.724895		-0.50419		0
								TRAFD1.Hs00938765_m1	-3.28401	STAT1.Hs01013995_g1	-1.41963		0.00712533	1.68753	0.478541		-1.94052		0
								TRAFD1.Hs00938765_m1	-3.28401	GBP2.Hs00894842_g1	-1.92578		0.00329211	2.14786	2.1722		-1.97491		0
								TRAFD1.Hs00938765_m1	-3.28401	STAT1.Hs01013998_m1	-2.90128		-0.000504025	2.1598	4.27616		-1.98836		0
								TRAFD1.Hs00938765_m1	-3.28401	SERPING1.Hs00934330_m1	-6.62821		-0.0629882	0.94911	3.41863		-2.66541		0
								TRAFD1.Hs00938765_m1	-3.28401	GBP2.Hs00894846_g1	-0.591707		-0.00772786	2.42651	-0.555942		-1.96635		0
								TRAFD1.Hs00938765_m1	-3.28401	GBP5-j4	-1.63667		-0.00224535	1.42678	0.826857		-1.50093		0
								GBP1.Hs00977005_m1	-1.38824	GBP2.Hs00894846_g1	-0.591707		1.45508	0.011358	0.598166		-1.42855		0
								GBP1.Hs00977005_m1	-1.38824	SERPING1.Hs00934329_m1	-6.28625		1.49369	-0.00043339	0.320276		-1.7506		0
								GBP1.Hs00977005_m1	-1.38824	GBP2.Hs00894842_g1	-1.92578		1.09574	0.583467	1.03006		-1.61471		0
								GBP1.Hs00977005_m1	-1.38824	GBP2.Hs00894846_g1	-0.591707		1.47157	0.0111962	0.610537		-1.43898		0
								GBP1.Hs00977005_m1	-1.38824	GBP2.Hs00894837_m1	-1.12356		1.47924	-0.00143613	0.620878		-1.43104		0
								GBP2.Hs00894846_g1	-0.591707	GBP1.Hs00977005_m1	-1.38824		0.0121025	1.45439	0.597851		-1.42835		0
								GBP2.Hs00894846_g1	-0.591707	SERPING1.Hs00934329_m1	-6.28625		2.45775	-0.00759428	-0.664409		-2.07094		0
								GBP2.Hs00894846_g1	-0.591707	TAP1.Hs00388675_m1	-2.69738		1.37355	0.923528	0.16456		-3.13928		0
								GBP2.Hs00894846_g1	-0.591707	GBP1.Hs00266717_m1	-0.884587		0.392356	1.16601	0.765801		-0.497796		0
								GBP2.Hs00894846_g1	-0.591707	SCARF1.Hs01092483_m1	-8.27157		0.804906	0.943157	4.20691		-4.07074		0
								GBP2.Hs00894846_g1	-0.591707	SERPING1.Hs00934328_g1	-6.88806		2.45867	-0.00779154	-0.515874		-1.91702		0
								GBP2.Hs00894846_g1	-0.591707	STAT1.Hs01013995_g1	-1.41963		1.01781	1.09662	0.300605		-1.85843		0
								GBP2.Hs00894846_g1	-0.591707	GBP1.Hs00266717_m1	-0.884587		0.392352	1.166	0.765789		-0.497797		0
								GBP2.Hs00894846_g1	-0.591707	GBP1.Hs00266717_m1	-0.884587		0.381078	1.17719	0.771042		-0.495771		0
								GBP2.Hs00894846_g1	-0.591707	GBP1.Hs00977005_m1	-1.38824		0.00894593	1.47941	0.611006		-1.44806		0
								GBP2.Hs00894846_g1	-0.591707	STAT1.Hs01014000_m1	-3.98826		1.83002	0.585907	1.30532		-2.11426		0
								GBP2.Hs00894846_g1	-0.591707	SCARF1.Hs01092482_g1	-7.12501		2.4409	-0.00761351	-0.628835		-2.01889		0
								GBP2.Hs00894846_g1	-0.591707	STAT1.Hs01013989_m1	-0.960667		-0.243619	2.34986	0.887395		-1.22589		0
								GBP2.Hs00894846_g1	-0.591707	STAT1.Hs01013998_m1	-2.90128		0.755166	1.50715	3.02742		-1.79208		0
								GBP2.Hs00894846_g1	-0.591707	SERPING1.Hs00934330_m1	-6.62821		-0.107372	0.989441	3.67548		-2.81921		0
								GBP2.Hs00894846_g1	-0.591707	GBP5-j4	-1.63667		-0.0211427	1.43378	1.0599		-1.27421		0
								GBP1.Hs00977005_m1	-1.38824	STAT1.Hs01013995_g1	-1.41963		1.22344	0.420315	0.685002		-1.61011		0
								GBP1.Hs00977005_m1	-1.38824	GBP2.Hs00894842_g1	-1.92578		1.08304	0.548068	1.00401		-1.55496		0
								GBP1.Hs00977005_m1	-1.38824	STAT1.Hs01013998_m1	-2.90128		1.35851	0.230722	1.02919		-1.52613		0
								GBP1.Hs00977005_m1	-1.38824	SERPING1.Hs00934330_m1	-6.62821		0.216417	0.808309	3.07918		-2.5789		0
								GBP1.Hs00977005_m1	-1.38824	GBP2.Hs00894846_g1	-0.591707		1.48007	0.00576588	0.615471		-1.44263		0
								SERPING1.Hs00934329_m1	-6.28625	GBP2.Hs00894840_mH	-0.980367		0.00892279	1.97902	0.59293		-1.40333		0
								SERPING1.Hs00934329_m1	-6.28625	SERPING1.Hs00934328_g1	-6.88806		0.923962	-0.925328	0.647415		1.21287		1
								SERPING1.Hs00934329_m1	-6.28625	STAT1.Hs01013998_m1	-2.90128		-0.000346258	2.11283	4.08355		-2.04418		0
								SERPING1.Hs00934329_m1	-6.28625	GBP2.Hs00894846_g1	-0.591707		-0.00758256	2.4577	-0.668225		-2.0748		0
								SERPING1.Hs00934329_m1	-6.28625	GBP2.Hs00894837_m1	-1.12356		-0.00562271	2.76607	-1.88195		-4.95444		0
								GBP1.Hs00266717_m1	-0.884587	SCARF1.Hs01092483_m1	-8.27157		1.08049	0.787208	4.44797		-3.01926		0
								GBP1.Hs00266717_m1	-0.884587	SERPING1.Hs00934330_m1	-6.62821		0.189414	0.815617	3.14513		-2.4285		0
								GBP1.Hs00266717_m1	-0.884587	GBP2.Hs00894846_g1	-0.591707		1.16599	0.392351	0.765784		-0.497792		0
								SCARF1.Hs01092483_m1	-8.27157	SERPING1.Hs00934328_g1	-6.88806		1.17296	-0.00065024	5.05175		-4.64599		0
								SCARF1.Hs01092483_m1	-8.27157	STAT1.Hs01013995_g1	-1.41963		0.818695	1.24316	4.26207		-4.27464		0
								SCARF1.Hs01092483_m1	-8.27157	GBP2.Hs00894842_g1	-1.92578		0.813532	1.25883	4.94645		-4.20696		0
								SCARF1.Hs01092483_m1	-8.27157	STAT1.Hs01013998_m1	-2.90128		0.891858	1.3931	7.07665		-4.34218		0
								SCARF1.Hs01092483_m1	-8.27157	GBP2.Hs00894846_g1	-0.591707		0.962467	0.821385	4.3109		-4.13623		0
								SERPING1.Hs00934328_g1	-6.88806	GBP2.Hs00894846_g1	-0.591707		-0.00779865	2.4587	-0.51415		-1.91526		0
								STAT1.Hs01013995_g1	-1.41963	GBP2.Hs00894837_m1	-1.12356		0.912586	1.47967	-0.432093		-3.39012		0
								GBP2.Hs00894842_g1	-1.92578	GBP1.Hs00977005_m1	-1.38824		0.58192	1.10695	1.03815		-1.61921		0
								GBP2.Hs00894842_g1	-1.92578	STAT1.Hs01013998_m1	-2.90128		0.847927	1.34927	3.68526		-1.86226		0
								GBP2.Hs00894842_g1	-1.92578	SERPING1.Hs00934330_m1	-6.62821		0.178795	0.841153	3.25947		-2.66019		0
								GBP1.Hs00977005_m1	-1.38824	GBP2.Hs00894837_m1	-1.12356		1.47803	-0.0085356	0.621696		-1.42057		0
								STAT1.Hs01013991_m1	-5.94201	SERPING1.Hs00934330_m1	-6.62821		0.142577	0.878605	3.80188		-2.86889		0
								STAT1.Hs01013989_m1	-0.960667	SERPING1.Hs00934330_m1	-6.62821		0.555923	0.664478	2.71143		-2.22692		0
								STAT1.Hs01013989_m1	-0.960667	GBP2.Hs00894846_g1	-0.591707		2.3479	-0.220153	0.892446		-1.23284		0
								STAT1.Hs01013998_m1	-2.90128	SERPING1.Hs00934330_m1	-6.62821		0.172006	0.863022	3.56453		-2.6548		0
								SERPING1.Hs00934330_m1	-6.62821	ETV7.Hs00903228_m1	-7.1842		0.893693	-0.000307422	3.26652		-2.65485		0
								SERPING1.Hs00934330_m1	-6.62821	GBP2.Hs00894846_g1	-0.591707		0.965934	-0.0986572	3.56846		-2.77557		0
								SERPING1.Hs00934330_m1	-6.62821	GBP2.Hs00894837_m1	-1.12356		0.91319	0.0333932	3.34469		-2.74564		0
								GBP2.Hs00894846_g1	-0.591707	GBP5-j4	-1.63667		0.0288874	1.3975	1.03954		-1.2648		0
								GBP2.Hs00894837_m1	-1.12356	GBP5-j4	-1.63667		0.117087	1.3916	0.983624		-1.42552		0
